# Supplementary material
Source: Springer Nature journal article supplement (https://www.springermedizin.de/resource/supplementary/12885_2012_3385_MOESM2_ESM.pdf/9463746)

**A**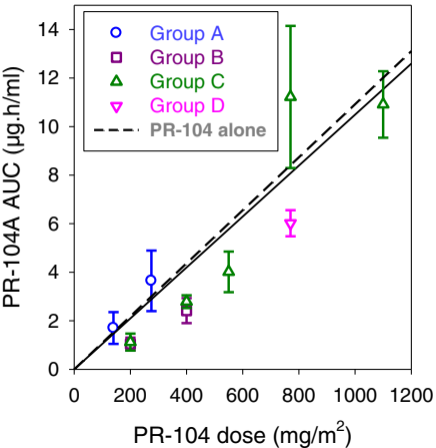**B**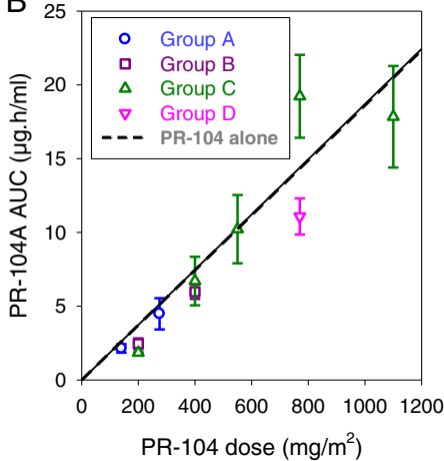

Supplement: MOESM2 [file 9463746]
